# Supplementary material for: A tumor microenvironment gene set–Based prognostic signature for non-small-cell lung cancer
Source: Front Mol Biosci. 2022 Aug 10;9:849108. doi: 10.3389/fmolb.2022.849108 (PMC9400803; doi:10.3389/fmolb.2022.849108)
Supplement: Supplementary file 2 [file Table1.xlsx]

## Sheet: Sheet1
TCGA training group	TCGA testing group	GSE50081 testing group	IMvigor dataset	GSE13213 testing group
TCGA-93-A4JP	TCGA-55-7816	GSM1213669	SAMf2ce197162ce	GSM333703
TCGA-05-4434	TCGA-64-1680	GSM1213670	SAM698d8d76b934	GSM333763
TCGA-78-7160	TCGA-38-4632	GSM1213671	SAMc1b27bc16435	GSM333739
TCGA-L9-A5IP	TCGA-05-4244	GSM1213672	SAM85e41e7f33f9	GSM333690
TCGA-97-8171	TCGA-78-7156	GSM1213673	SAMf275eb859a39	GSM333774
TCGA-99-8033	TCGA-69-8254	GSM1213674	SAM7f0d9cc7f001	GSM333750
TCGA-05-4402	TCGA-55-8512	GSM1213675	SAM4305ab968b90	GSM333698
TCGA-78-7145	TCGA-55-8620	GSM1213676	SAMcf018fee2acd	GSM333749
TCGA-05-4425	TCGA-55-8094	GSM1213677	SAMb2f1d0e54ece	GSM333699
TCGA-55-6968	TCGA-53-7624	GSM1213678	SAMcc4675f394a1	GSM333748
TCGA-05-4396	TCGA-50-6591	GSM1213679	SAM49f9b2e57aa5	GSM333737
TCGA-53-7813	TCGA-86-7701	GSM1213680	SAM2e7aa8fa0ab3	GSM333706
TCGA-49-4494	TCGA-73-4670	GSM1213681	SAMd0e47be700b0	GSM333716
TCGA-49-4490	TCGA-MP-A4T7	GSM1213682	SAMdf3e42c8672a	GSM333787
TCGA-95-A4VK	TCGA-78-7167	GSM1213683	SAMd027124354ce	GSM333775
TCGA-97-7554	TCGA-73-4666	GSM1213684	SAM36d87392593b	GSM333765
TCGA-64-1677	TCGA-55-A48Z	GSM1213685	SAM4edbe45817b3	GSM333773
TCGA-62-8402	TCGA-78-7158	GSM1213686	SAM36a9225b0222	GSM333740
TCGA-78-7536	TCGA-62-8394	GSM1213687	SAMe7bf6c015192	GSM333736
TCGA-73-4659	TCGA-50-5933	GSM1213688	SAM6dd7ad1d797d	GSM333758
TCGA-MP-A4T9	TCGA-50-5044	GSM1213689	SAMc0d625a50eb8	GSM333778
TCGA-78-7220	TCGA-05-4398	GSM1213690	SAM18039827e1b9	GSM333700
TCGA-49-AAR4	TCGA-78-7149	GSM1213691	SAM681e4bf7cf85	GSM333730
TCGA-50-5930	TCGA-86-8359	GSM1213692	SAMc692536a795a	GSM333711
TCGA-MP-A4T6	TCGA-55-8615	GSM1213693	SAM9a2cf3c06fb3	GSM333772
TCGA-49-6761	TCGA-78-7154	GSM1213694	SAM557dde1b9f3e	GSM333694
TCGA-55-6981	TCGA-99-8025	GSM1213695	SAMb8f13a0525a6	GSM333679
TCGA-05-4418	TCGA-55-7283	GSM1213696	SAM23aa15d4a0b0	GSM333788
TCGA-05-5429	TCGA-50-6594	GSM1213697	SAM468a9e1dc821	GSM333696
TCGA-35-5375	TCGA-69-7974	GSM1213698	SAM81b71522417a	GSM333746
TCGA-73-4675	TCGA-50-5941	GSM1213699	SAM6cb230f208a8	GSM333683
TCGA-64-5775	TCGA-49-6745	GSM1213700	SAM0684af734db1	GSM333682
TCGA-69-7765	TCGA-50-5051	GSM1213701	SAMb963dda93cfd	GSM333715
TCGA-05-4397	TCGA-62-8398	GSM1213702	SAMa9ca8536d2b1	GSM333761
TCGA-05-5425	TCGA-91-6848	GSM1213703	SAM9fb814c22bdb	GSM333751
TCGA-62-A471	TCGA-62-8399	GSM1213704	SAMbcbc7957c264	GSM333691
TCGA-78-7166	TCGA-55-6970	GSM1213705	SAM7fb6987514a4	GSM333785
TCGA-78-8660	TCGA-55-1594	GSM1213706	SAM63405b04ab2d	GSM333781
TCGA-49-4506	TCGA-MP-A4T8	GSM1213707	SAM18bc1078bc15	GSM333725
TCGA-44-6779	TCGA-49-4512	GSM1213708	SAM7d2dfba6cd84	GSM333771
TCGA-55-7994	TCGA-62-A46Y	GSM1213709	SAMd1bd63734394	GSM333717
TCGA-69-7760	TCGA-MP-A4TD	GSM1213710	SAMe9ae8beb82fa	GSM333692
TCGA-05-4424	TCGA-78-7146	GSM1213711	SAMb0a83e5fbde9	GSM333782
TCGA-91-7771	TCGA-50-5072	GSM1213712	SAMba7176afe070	GSM333674
TCGA-69-A59K	TCGA-50-6595	GSM1213713	SAMae1690469964	GSM333693
TCGA-73-A9RS	TCGA-86-A4P8	GSM1213714	SAMbe83eae4026e	GSM333701
TCGA-05-4427	TCGA-86-7714	GSM1213715	SAMe5bc41772bc9	GSM333708
TCGA-44-2665	TCGA-55-8505	GSM1213716	SAM23095936e611	GSM333719
TCGA-05-5428	TCGA-50-6593	GSM1213717	SAM7114d99032ec	GSM333735
TCGA-49-6744	TCGA-44-6774	GSM1213718	SAMd215b503f99a	GSM333769
TCGA-MN-A4N1	TCGA-64-1679	GSM1213719	SAMdb3f50c9129c	GSM333767
TCGA-86-6562	TCGA-49-6743	GSM1213720	SAMbf1a3ae828e6	GSM333705
TCGA-86-8674	TCGA-NJ-A7XG	GSM1213721	SAM52e3fa3ad574	GSM333729
TCGA-86-8279	TCGA-49-4507	GSM1213722	SAMd4c0837b0997	GSM333707
TCGA-73-4676	TCGA-55-7227	GSM1213723	SAM9cafb905b36a	GSM333687
TCGA-91-A4BD	TCGA-05-5420	GSM1213724	SAM3f2033c90438	GSM333760
TCGA-69-8253	TCGA-86-8056	GSM1213725	SAM032c642382a7	GSM333741
TCGA-50-5055	TCGA-99-7458	GSM1213726	SAM5ffd7e4cd794	GSM333718
TCGA-78-7539	TCGA-05-4250	GSM1213727	SAMb419a8fcbfcd	GSM333762
TCGA-MP-A4TF	TCGA-44-5643	GSM1213728	SAM8884fe446d20	GSM333784
TCGA-55-6975	TCGA-38-6178	GSM1213729	SAM17c45bf16bb6	GSM333752
TCGA-91-6830	TCGA-05-4384	GSM1213730	SAM2070b416069c	GSM333676
TCGA-95-7039	TCGA-44-3396	GSM1213731	SAM0ce9c983b20f	GSM333780
TCGA-44-4112	TCGA-91-6849	GSM1213732	SAMa1e62d323e1d	GSM333704
TCGA-05-4382	TCGA-55-7727	GSM1213733	SAM61baf919bb01	GSM333777
TCGA-05-4390	TCGA-MP-A4TC	GSM1213734	SAM97a00e0929fb	GSM333680
TCGA-05-4417	TCGA-05-4395	GSM1213735	SAM2f228939632f	GSM333753
TCGA-05-4433	TCGA-05-4415	GSM1213736	SAM9539a4f19ebc	GSM333744
TCGA-44-2657	TCGA-69-7978	GSM1213737	SAM36851bc8b9ae	GSM333720
TCGA-97-A4LX	TCGA-95-7567	GSM1213738	SAM297c0301e861	GSM333713
TCGA-73-7499	TCGA-86-8671	GSM1213739	SAM1fa6bcb7fc48	GSM333764
TCGA-55-7815	TCGA-49-4510	GSM1213740	SAM075e037d95bc	GSM333747
TCGA-55-7724	TCGA-MP-A4SW	GSM1213741	SAM6d2ae0c39b96	GSM333745
TCGA-44-7661	TCGA-55-1596	GSM1213742	SAMcabb6d58ff55	GSM333755
TCGA-44-7671	TCGA-MP-A4TK	GSM1213743	SAM716f54e468f4	GSM333770
TCGA-86-A4P7	TCGA-50-5045	GSM1213744	SAMeff2ce356ccb	GSM333783
TCGA-44-7662	TCGA-78-7150	GSM1213745	SAM110501d0eedb	GSM333710
TCGA-55-8087	TCGA-55-6979	GSM1213746	SAM2e9ac0b1b250	GSM333776
TCGA-97-8177	TCGA-50-5068	GSM1213747	SAMc0ef41aa6c8b	GSM333689
TCGA-55-8301	TCGA-MP-A4SY	GSM1213748	SAMd636e3461955	GSM333786
TCGA-86-8073	TCGA-49-4505	GSM1213749	SAMe712352fb82a	GSM333697
TCGA-50-5939	TCGA-05-5423	GSM1213750	SAM30b5c6c54cf7	GSM333731
TCGA-67-3772	TCGA-73-4668	GSM1213751	SAMd98bac0a070f	GSM333722
TCGA-50-6597	TCGA-78-7147	GSM1213752	SAM8e8ef2368dfa	GSM333709
TCGA-MP-A5C7	TCGA-MP-A4T4	GSM1213753	SAM08cce2fa88f2	GSM333702
TCGA-55-8091	TCGA-49-AAR3	GSM1213754	SAMb4c7a001537d	GSM333677
TCGA-05-4405	TCGA-78-7148	GSM1213755	SAMfd947610629d	GSM333759
TCGA-44-7660	TCGA-55-6984	GSM1213756	SAM943df5cf15df	GSM333726
TCGA-50-5066	TCGA-64-5815	GSM1213757	SAM31f41dd0d6ca	GSM333779
TCGA-78-7537	TCGA-50-5932	GSM1213758	SAMb3c02294aba7	GSM333675
TCGA-05-4422	TCGA-55-6982	GSM1213759	SAM39eb94fa504d	GSM333673
TCGA-86-7954	TCGA-55-5899	GSM1213760	SAM62fb1388c871	GSM333721
TCGA-78-7152	TCGA-49-6767	GSM1213761	SAMc0da5d48686d	GSM333727
TCGA-78-7153	TCGA-44-7667	GSM1213762	SAMe7bcab05402e	GSM333768
TCGA-64-5778	TCGA-86-A4JF	GSM1213763	SAM2570ff4aae6e	GSM333742
TCGA-71-8520	TCGA-78-8648	GSM1213764	SAM2dc3f04e45e9	GSM333789
TCGA-78-7542	TCGA-49-AAR9	GSM1213765	SAM9448d858692c	GSM333733
TCGA-55-8302	TCGA-38-4629	GSM1213766	SAM4501e41e4751	GSM333766
TCGA-50-5049	TCGA-67-4679	GSM1213767	SAM714285adf612	GSM333743
TCGA-55-1592	TCGA-J2-8194	GSM1213768	SAM5b57e47fdcb3	GSM333678
TCGA-55-A57B	TCGA-78-7161	GSM1213769	SAMae4da274eded	GSM333738
TCGA-44-3398	TCGA-62-A472	GSM1213770	SAMd35318127278	GSM333728
TCGA-97-A4M7	TCGA-62-8397	GSM1213771	SAMa913c6139ec8	GSM333734
TCGA-55-8208	TCGA-44-8119	GSM1213772	SAM75142fcab9df	GSM333686
TCGA-69-7763	TCGA-55-7284	GSM1213773	SAMd697ba701077	GSM333681
TCGA-55-8085	TCGA-55-8092	GSM1213774	SAM166a419a4e5a	GSM333756
TCGA-55-8206	TCGA-62-8395	GSM1213775	SAM025b45c27e05	GSM333688
TCGA-J2-A4AE	TCGA-38-4628	GSM1213776	SAMe07c4560772d	GSM333732
TCGA-91-8497	TCGA-05-4432	GSM1213777	SAM2dc578e0165f	GSM333712
TCGA-55-8621	TCGA-44-2659	GSM1213778	SAM3785587846ce	GSM333723
TCGA-97-A4M2	TCGA-38-4626	GSM1213779	SAM560f23d6a3ad	GSM333685
TCGA-L9-A443	TCGA-L9-A743	GSM1213780	SAM52500cabdd36	GSM333684
TCGA-55-7570	TCGA-95-A4VN	GSM1213781	SAM14df63a65411	GSM333724
TCGA-55-8097	TCGA-J2-8192	GSM1213782	SAMf3a9bce50099	GSM333714
TCGA-55-8507	TCGA-L9-A7SV	GSM1213783	SAMffa5c7cad0e5	GSM333754
TCGA-97-A4M1	TCGA-86-7711	GSM1213784	SAMdab9ca8fb5de	GSM333695
TCGA-MP-A4TA	TCGA-55-6712	GSM1213785	SAM34430ef08e5b	GSM333757
TCGA-O1-A52J	TCGA-MP-A4TI	GSM1213786	SAM4b0175e8db6e
TCGA-05-4389	TCGA-67-6217	GSM1213787	SAMf28c01545593
TCGA-50-5942	TCGA-55-7907	GSM1213788	SAMaec7380f9ab0
TCGA-73-4662	TCGA-86-8055	GSM1213789	SAMaf7578d55754
TCGA-44-6145	TCGA-44-7670	GSM1213790	SAMbd8ee73983b8
TCGA-44-5645	TCGA-44-7669	GSM1213791	SAMe94c30c30616
TCGA-83-5908	TCGA-55-A48X	GSM1213792	SAM54e58f1b0230
TCGA-97-7553	TCGA-38-4627	GSM1213793	SAM5e3bae090b8c
TCGA-55-6980	TCGA-55-7914	GSM1213794	SAM3cb94b0d5297
TCGA-05-4410	TCGA-86-6851	GSM1213795	SAM61b9d4d84c64
TCGA-05-5715	TCGA-L9-A50W	GSM1213796	SAM8a42c0d59187
TCGA-55-8616	TCGA-78-8640	GSM1213797	SAMcb132b0cdd2c
TCGA-49-AARQ	TCGA-53-7626	GSM1213798	SAMe97af0feefdf
TCGA-95-7944	TCGA-55-7910	GSM1213799	SAMee3844cc0b9f
TCGA-95-7947	TCGA-86-8280	GSM1213800	SAM73b653ae20d1
TCGA-MN-A4N5	TCGA-MP-A4TE	GSM1213801	SAMdcae54fcd7fa
TCGA-99-8032	TCGA-97-8174	GSM1213802	SAMdad5c29dc105
TCGA-86-8281	TCGA-55-A48Y	GSM1213803	SAMa424c75831b4
TCGA-L4-A4E5	TCGA-86-7713	GSM1213804	SAM28687037e4ff
	TCGA-64-1678	GSM1213805	SAMe50d15fde368
	TCGA-55-8205	GSM1213806	SAM45c8e6412c66
	TCGA-55-6978	GSM1213807	SAM8533e5e261d6
	TCGA-95-8494	GSM1213808	SAMaaf505c36f93
	TCGA-95-7562	GSM1213809	SAM73663ee4a96e
	TCGA-86-8074	GSM1213810	SAM0bdb3428bd13
	TCGA-49-AAQV	GSM1213811	SAM3330c03fdf00
	TCGA-86-8672	GSM1213812	SAM0a7c2091dd56
	TCGA-55-8506	GSM1213813	SAM7bff231634e9
	TCGA-86-A4D0	GSM1213814	SAM5d1dfd5207f5
	TCGA-91-A4BC	GSM1213815	SAMeb587a68006b
	TCGA-55-A490	GSM1213816	SAM99a46b9eec27
	TCGA-44-2668	GSM1213817	SAM1ac4e3dee297
	TCGA-05-4430	GSM1213818	SAM553c3c35b847
	TCGA-05-4249	GSM1213819	SAM3e04eb914f3d
	TCGA-05-4426	GSM1213820	SAMc2a1820d4e6b
	TCGA-38-4631	GSM1213821	SAM822b226466a1
	TCGA-69-7973	GSM1213822	SAMabc151b01ea3
	TCGA-95-7948	GSM1213823	SAMe1eb5d988760
	TCGA-86-8358	GSM1213824	SAMe3210d3632b4
	TCGA-44-5644	GSM1213825	SAMb15ad09d6e24
	TCGA-67-6215	GSM1213826	SAM7893196e0e89
	TCGA-55-7576	GSM1213827	SAM3f446449bf81
	TCGA-44-8117	GSM1213828	SAM961d04c42bd9
	TCGA-97-8175	GSM1213829	SAMb0d11db9aa79
	TCGA-55-8510	GSM1213830	SAM19fec8f3b3bd
	TCGA-86-8585	GSM1213831	SAM6083aac8db99
	TCGA-44-8120	GSM1213832	SAM7ee2b6e4d6b3
	TCGA-97-A4M0	GSM1213833	SAMa90d73f8d891
	TCGA-55-A494	GSM1213834	SAMaff272833538
	TCGA-86-7955	GSM1213835	SAM415f36ad349e
	TCGA-91-8496	GSM1213836	SAM7c67b05aa109
	TCGA-L9-A8F4	GSM1213837	SAMad83c9c53537
	TCGA-55-7574	GSM1213838	SAM3e8baff50d7a
	TCGA-97-7937	GSM1213839	SAM3ee5dcd894f0
	TCGA-38-4625	GSM1213840	SAM8a1b0e02ee42
	TCGA-55-8096	GSM1213841	SAMd7d57ee3a863
	TCGA-55-8514	GSM1213842	SAMeb29625f76a5
	TCGA-44-6775	GSM1213843	SAM563d6233dfa2
	TCGA-55-8511	GSM1213844	SAM4581bac493af
	TCGA-55-8614	GSM1213845	SAMa1871f491b02
	TCGA-93-8067	GSM1213846	SAM30cf07d4874f
	TCGA-44-A47A	GSM1213847	SAM31291c256373
	TCGA-44-A47B	GSM1213848	SAMd135d5867fe3
	TCGA-55-8204	GSM1213849	SAM9e11ec6bea80
	TCGA-44-3917		SAM065890737112
	TCGA-05-4420		SAMb470eb8f04be
	TCGA-78-7535		SAM675a12a09c15
	TCGA-71-6725		SAM1e9c4d1d39ae
	TCGA-91-6836		SAM5a2347c0498a
	TCGA-78-8662		SAM0571f17f4045
	TCGA-62-A46R		SAM4b7ea015fd9e
	TCGA-64-5781		SAM9306c5c92444
	TCGA-55-6985		SAMb15ac6e4c4ef
	TCGA-44-2656		SAM28e6031ac18b
	TCGA-55-6971		SAMd86389d0d768
	TCGA-64-5774		SAM63b2189c36d7
	TCGA-78-7163		SAM18be5b395318
	TCGA-86-8673		SAM0d855cff64e6
	TCGA-78-7143		SAM6cbc10abddb0
	TCGA-91-6847		SAMdee1011782cd
	TCGA-55-6642		SAMe9475f77504b
	TCGA-NJ-A4YG		SAMa535fcdf18a0
	TCGA-62-A46P		SAM7746b76437e6
	TCGA-44-2662		SAM548551ef782c
	TCGA-62-A46O		SAM203dcf14f927
	TCGA-91-6831		SAMe41b1e773582
	TCGA-78-7540		SAM978a587b207e
	TCGA-86-8075		SAM5234688806a7
	TCGA-MP-A4SV		SAM2c9586161ce6
	TCGA-78-7633		SAM76a431ba6ce1
	TCGA-97-7547		SAM7a9093b9c7e9
	TCGA-49-4501		SAM8f2275c36e8c
	TCGA-78-7155		SAMab8052a03398
	TCGA-97-7552		SAMd3bd67996035
	TCGA-50-6592		SAMfddc359e862b
	TCGA-55-6972		SAM753d4bb52dbe
	TCGA-50-6590		SAMd3601288319e
	TCGA-62-A46S		SAM59f392864f5d
	TCGA-67-3774		SAM26104d5adc89
	TCGA-44-A479		SAMba1a34b5a060
	TCGA-55-6986		SAM18a4dabbc557
	TCGA-38-4630		SAMfb7aec7cb0e2
	TCGA-50-5931		SAMfed609955db9
	TCGA-05-4403		SAMb8070b7937e7
	TCGA-91-6829		SAMf2aae1443f67
	TCGA-62-A46V		SAM2bba8cb35e48
	TCGA-73-4658		SAMcee0fa8c05b4
	TCGA-67-3773		SAM5c139c5c1c4f
	TCGA-44-6777		SAMc1251c7bfee2
	TCGA-35-4123		SAM6780ed436b55
	TCGA-44-7672		SAM85f0a3ac1c45
	TCGA-4B-A93V		SAM9d2494119c05
	TCGA-MN-A4N4		SAM9410b866974a
	TCGA-73-7498		SAM5d989c86255e
	TCGA-91-6840		SAM27299aed7681
	TCGA-55-6543		SAM49d48750e294
	TCGA-55-7913		SAMd43f8933066b
	TCGA-55-8299		SAM7aa01fc49a80
	TCGA-86-8668		SAM0257bbbbd388
	TCGA-55-7903		SAMc919aebc7fdd
	TCGA-86-8669		SAMa321770ac31c
	TCGA-J2-A4AG		SAM3894ac3956a5
	TCGA-NJ-A55R		SAM3779e979db6b
	TCGA-44-6147		SAM1c0ecfb3eb63
	TCGA-S2-AA1A		SAMbf91f27e7f9b
	TCGA-86-7953		SAMbcb07ba81cee
	TCGA-97-A4M3		SAM9aa6a095a9d6
	TCGA-55-8203		SAM957378bd907f
	TCGA-NJ-A4YQ		SAMf82bbdc267c8
	TCGA-44-7659		SAM2624229effe8
	TCGA-55-7281		SAMd2492b2a31bb
	TCGA-55-A4DG		SAM670649e105b5
	TCGA-55-7726		SAM91c47b054ffb
	TCGA-55-7573		SAM491e341d5a82
	TCGA-44-A4SS		SAM5fe7a81a39dd
	TCGA-55-7995		SAM29da928587ad
	TCGA-69-7764		SAM0a0f2bac4b20
	TCGA-55-A491		SAM8e469834acc1
	TCGA-97-A4M5		SAM8e43e9caf307
	TCGA-55-A4DF		SAM99b1f6a9534e
	TCGA-49-AARO		SAM12502d970c10
	TCGA-97-A4M6		SAM9681450bbc90
	TCGA-99-8028		SAM7d7c54623618
	TCGA-55-8089		SAM181b638b8248
	TCGA-67-6216		SAMbfdffb97c446
	TCGA-64-1676		SAM3b15b4c6311d
	TCGA-L9-A444		SAM00b9e5c52da9
	TCGA-J2-A4AD		SAM59b825252c0d
	TCGA-50-8457		SAM1c8b086175ca
	TCGA-95-7043		SAMeaa477a5384b
	TCGA-44-A4SU		SAM1dda30f1c5be
	TCGA-55-7725		SAM9eebdef2858a
	TCGA-91-6828		SAM9daccafc18db
	TCGA-99-AA5R		SAM2eb07dedf07f
	TCGA-55-A492		SAM25510f300d79
	TCGA-55-7911		SAMbda79f955628
	TCGA-MP-A4TH		SAM9b9d48b0b02c
	TCGA-69-8255		SAMff41c4e8c08f
	TCGA-50-8460		SAMc97f35a29d16
	TCGA-93-7348		SAM187e056d6a2a
	TCGA-93-7347		SAMbc8dc3a7b54e
	TCGA-86-A456		SAM7b40007f4aa4
	TCGA-55-8090		SAM568ce160abd9
	TCGA-86-8076		SAM14938611a2d3
	TCGA-NJ-A4YF		SAM1a87df750b9d
	TCGA-49-AARE		SAMae02629a97f7
	TCGA-49-AARN		SAM47fc46c3d6be
	TCGA-49-AAR0		SAM7829a341b9f3
	TCGA-44-6778		SAM0f956e757453
	TCGA-50-7109		SAMaf42c1541269
	TCGA-78-7159		SAM09c84ec0cf34
	TCGA-44-3918		SAM7538ad9ff524
	TCGA-44-6776		SAM95c70496ffb5
	TCGA-64-1681		SAM7edacb3deb65
	TCGA-50-5946		SAMb2e4a082541a
	TCGA-44-2655		SAM771445e92421
	TCGA-L4-A4E6		SAM59fda9035d1d
	TCGA-49-AARR		SAM727c0e92a2a7
	TCGA-35-4122		SAM6f2a102a99df
	TCGA-44-2661		SAMe56c96c51190
	TCGA-67-3770		SAM2b672f4336c7
	TCGA-44-3919		SAM1ab1b28d9f2b
	TCGA-49-4486		SAM1bcc62d8290c
	TCGA-49-4487		SAM6662f5181f87
	TCGA-38-7271		SAMe0c49ea0df5d
	TCGA-44-A47G		SAM59289ca42c99
	TCGA-49-4488		SAM18b9351e265a
	TCGA-78-7162		SAM7fb7a13c096b
	TCGA-55-6987		SAM87a8e18eb45b
	TCGA-78-8655		SAM1f3c93814cb9
	TCGA-67-3771		SAM5fc9ae0aed1f
	TCGA-49-4514		SAM9725303dce0c
	TCGA-50-5935		SAM6ff654a20f98
	TCGA-NJ-A4YP		SAM65afda25b920
	TCGA-55-A493		SAMef0e3d2415fd
	TCGA-73-4677		SAM07a93a28f801
	TCGA-44-2666		SAM94859b440b1d
	TCGA-35-3615		SAM58e7832f4e7d
	TCGA-69-7980		SAMc57eadb2d82b
	TCGA-91-8499		SAMd5ab7fbfab4e
	TCGA-97-8552		SAM5767dd75d142
	TCGA-93-A4JO		SAMaabf4afe4213
	TCGA-97-7938		SAMcc7a42d87e9c
	TCGA-91-6835		SAMce39dd79b441
	TCGA-50-6673		SAM75f12d1a55fc
			SAM6964a6d7b967
			SAM3b1066e5801b
			SAMf20b827dca51
			SAM6792d6e98068
			SAM31d9176e11fb
			SAM04c589eb3fb3
			SAM5cc2d9036053
			SAMb8101c538753
			SAM80c6183220e6
			SAM572f19794c96
			SAM1abf01dd4544
			SAM1f83ebd6be9b
			SAM1f66db567eb5
			SAM4918c524b83a
			SAMa0ca029b7afd
			SAM6157c8f38b72
			SAMe7e4f7c076a7
			SAMbe25e2c88f3e
			SAM4caabd64e7fd
			SAMc6eff056c89a
			SAM5cfa1699bdb7
			SAMda4d892fddc8
			SAM3a1c9632ff7b
			SAM8b4b8b0f9e73
			SAMe3d4266775a9
			SAM2de7cffb5f72
